# Supplementary material for: Thermal sensitivity links to cellular cardiac decline in three spiny lobsters
Source: PubMed Central journal article supplement (PMC6959275; doi:10.1038/s41598-019-56794-0), 2020-01-14
Supplement: 41598_2019_56794_MOESM2_ESM.pdf [file 41598_2019_56794_MOESM2_ESM.pdf]

## **Supplementary Information**

### **Thermal sensitivity links to cellular cardiac decline in three spiny lobsters**

**Michael Oellermann<sup>1,\*</sup>, Anthony Jr. Hickey<sup>2</sup>, Quinn P. Fitzgibbon<sup>1</sup>, Greg Smith<sup>1</sup>**

<sup>1</sup> Fisheries and Aquaculture Centre, Institute for Marine and Antarctic Studies (IMAS), University of Tasmania, Hobart, Tasmania, 7001, Australia

<sup>2</sup> School of Biological Sciences, University of Auckland, Auckland, New Zealand

\* michael.oellermann@utas.edu.au

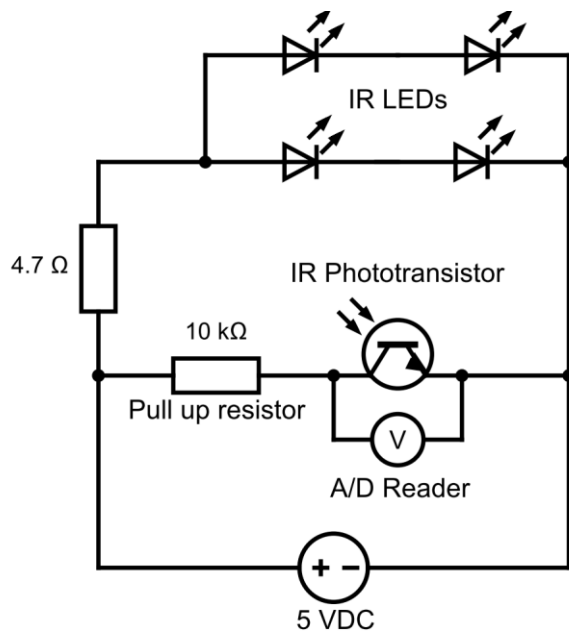

**Supplementary Figure S2:** Electrical circuit diagram for self-assembled photoplethysmographs to measure heart rate in spiny lobsters
